# Supplementary material for: Luminescence modulation, near white light emission, selective luminescence sensing, and anticounterfeiting via a series of Ln-MOFs with a π-conjugated and uncoordinated lewis basic triazolyl ligand
Source: Royal Society of Chemistry journal article supplement (doi:10.1039/d0qi01100b), 2020-11-13
Supplement: d0qi01100b1.pdf [file d0qi01100b1.pdf]

## ***Electronic Supplementary Information***

### **Luminescent Modulation, Near White Light Emission, Selective Luminescence Sensing, and Anticounterfeit via a Series of Ln-MOFs with $\pi$ -Conjugated and Uncoordinated Lewis Basic Triazolyl Ligand**

Lu-Lu Ma, Guo-Ping Yang\*, Gao-Peng Li, Peng-Feng Zhang, Jing Jin, Yao Wang,  
Jiao-Min Wang and Yao-Yu Wang\*

Key Laboratory of Synthetic and Natural Functional Molecule of the Ministry of  
Education, Shaanxi Key Laboratory of Physico-Inorganic Chemistry, College of  
Chemistry & Materials Science, Northwest University, Xi'an, 710127, Shaanxi, P. R.  
China. E-mail: [ygp@nwu.edu.cn](mailto:ygp@nwu.edu.cn); [wyaoyu@nwu.edu.cn](mailto:wyaoyu@nwu.edu.cn).

# Contents

Section S1. Materials and General Methods.

Table S1. Selected bond lengths (Å) and bond angles (°) for **1-Eu**, **1-Tb** and **1-Gd**.

Table S2. Summary of the quantum yields of the reported white-light-emission doped MOFs.

Table S3. The quenching constants of **1-Eu** and reported MOFs for NB.

Table S4. Results of ICP analyses of  $\text{Eu}^{3+}$ .

Figure S1. Coordination geometry of  $\text{Eu}^{3+}$  in **1-Eu**, (a) a distorted trigondodecahedron geometry (b) a distorted tetrakaidecahedron geometry.

Figure S2. Three coordination modes of  $\text{L}^{2-}$  in **1-Eu**.

Figure S3. PXRD patterns of **1-Eu** simulated from the X-ray single-crystal structure and as-synthesized samples of **1-Eu**, **1-Tb** and **1-Gd**.

Figure S4. PXRD patterns of doped samples.

Figure S5. The TGA plots of **1-Eu**, **1-Tb** and **1-Gd** under  $\text{N}_2$  environment.

Figure S6. The FT-IR spectrometer of **1-Eu**, **1-Tb** and **1-Gd**.

Figure S7. Solid state excitation spectra of  $\text{H}_2\text{L}$  (a), **1-Gd**(b), **1-Eu**(c) and **1-Tb**(d).

Figure S8. Solid-state emission spectra of  $\text{H}_2\text{L}$ (a), **1-Gd** (b).

Figure S9. Luminescence decay lifetimes of **1-Eu**(a), **1-Tb**(b) and **1-Gd**(c) measured at the excitation.

Figure S10. Linear correlation for the plot of  $(I_0/I)-1$  vs concentration of nitrobenzene in low concentration range.

Figure S11. UV-Vis adsorption spectrum of  $\text{H}_2\text{L}$ , and the excitation spectrum of **1-Eu**.

Figure S12. The PXRD patterns of **1-Eu** treated by small organic molecules solution.

Figure S13. The PXRD patterns of **1-Eu** treated by multi-cycle fluorescence quenching.

**Section S1. Materials and General Methods.** All materials were purchased commercially and used directly without any treatment. Thermogravimetric analysis (TGA) was performed on a NETZSCH STA 449C equipment under a N<sub>2</sub> atmosphere (10 °C min<sup>-1</sup>). Powder X-ray diffraction (PXRD) was carried out on a Bruker D8 ADVANCE powder X-ray diffractometer with Cu-K $\alpha$  radiation ( $\lambda=1.5418$  Å) at room temperature. Fourier transform infrared (FT-IR) spectroscopy was recorded as KBr pellets on an EQUINOX55 FT-IR spectrometer in 4000-400 cm<sup>-1</sup>. Elemental analyses (C, H, and N) were obtained with a PerkinElmer 2400C elemental analyzer. Luminescent spectra were determined on an Edinburgh FLS920 fluorescence spectrometer. UV-vis spectroscopic data were collected on a Hitachi U-3310 spectrometer. The quantum efficiency was tested by an integrating sphere on a FluoroMax-4 spectrophotometer.

**Table S1.** Selected bond lengths (Å) and bond angles (°) for **1-Eu**, **1-Tb** and **1-Gd**.

| <b>1-Eu</b>          |            |                      |            |
|----------------------|------------|----------------------|------------|
| Eu(1)-Eu(2)          | 4.0710(4)  | Eu(2)-O(4)#3         | 2.5059(17) |
| Eu(1)-O(7)#1         | 2.3347(18) | Eu(2)-O(12)#4        | 2.4327(19) |
| Eu(1)-O(1)           | 2.5994(18) | Eu(2)-O(5)           | 2.4424(17) |
| Eu(1)-O(5)           | 2.5453(18) | Eu(2)-O(3)#3         | 2.3848(19) |
| Eu(1)-O(10)#1        | 2.3615(19) | Eu(2)-O(11)#4        | 2.4309(19) |
| Eu(1)-O(2)           | 2.4748(19) | O(7)-Eu(1)#4         | 2.3346(18) |
| Eu(1)-O(6)           | 2.5601(18) | O(8)-Eu(2)#4         | 2.3188(18) |
| Eu(1)-O(13)          | 2.412(2)   | O(4)-Eu(2)#3         | 2.5059(17) |
| Eu(1)-N(3)#2         | 2.571(2)   | O(12)-Eu(2)#1        | 2.4329(19) |
| Eu(1)-O(14)          | 2.378(3)   | O(3)-Eu(2)#3         | 2.3849(19) |
| Eu(2)-O(9)           | 2.3050(18) | O(10)-Eu(1)#4        | 2.3616(18) |
| Eu(2)-O(8)#1         | 2.3189(18) | O(11)-Eu(2)#1        | 2.4309(19) |
| Eu(2)-O(1)           | 2.4257(17) | N(3)-Eu(1)#2         | 2.571(2)   |
| O(7)#1-Eu(1)-Eu(2)   | 64.65(5)   | O(14)-Eu(1)-O(13)    | 144.10(9)  |
| O(7)#1-Eu(1)-O(1)    | 76.43(6)   | O(14)-Eu(1)-N(3)#2   | 88.98(12)  |
| O(7)#1-Eu(1)-O(5)    | 81.27(6)   | O(9)-Eu(2)-Eu(1)     | 104.77(4)  |
| O(7)#1-Eu(1)-O(10)#1 | 82.05(7)   | O(9)-Eu(2)-O(8)#1    | 81.93(7)   |
| O(7)#1-Eu(1)-O(6)    | 129.43(6)  | O(9)-Eu(2)-O(1)      | 141.66(6)  |
| O(7)#1-Eu(1)-O(13)   | 80.45(8)   | O(9)-Eu(2)-O(4)#3    | 74.15(6)   |
| O(7)#1-Eu(1)-N(3)#2  | 152.05(7)  | O(9)-Eu(2)-O(12)#4   | 121.97(6)  |
| O(7)#1-Eu(1)-O(14)   | 86.33(11)  | O(9)-Eu(2)-O(5)      | 78.22(6)   |
| O(1)-Eu(1)-Eu(2)     | 34.48(4)   | O(9)-Eu(2)-O(3)#3    | 126.76(6)  |
| O(5)-Eu(1)-Eu(2)     | 34.47(4)   | O(9)-Eu(2)-O(11)#4   | 88.87(7)   |
| O(5)-Eu(1)-O(1)      | 65.03(6)   | O(8)#1-Eu(2)-Eu(1)   | 68.37(5)   |
| O(5)-Eu(1)-O(6)      | 51.07(5)   | O(8)#1-Eu(2)-O(1)    | 77.40(6)   |
| O(5)-Eu(1)-N(3)#2    | 124.07(6)  | O(8)#1-Eu(2)-O(4)#3  | 77.83(6)   |
| O(10)#1-Eu(1)-Eu(2)  | 146.70(5)  | O(8)#1-Eu(2)-O(12)#4 | 149.01(6)  |

|                      |            |                       |           |
|----------------------|------------|-----------------------|-----------|
| O(10)#1-Eu(1)-O(1)   | 139.62(6)  | O(8)#1-Eu(2)-O(5)     | 88.13(6)  |
| O(10)#1-Eu(1)-O(5)   | 144.13(6)  | O(8)#1-Eu(2)-O(3)#3   | 79.26(7)  |
| O(10)#1-Eu(1)-O(2)   | 129.77(7)  | O(8)#1-Eu(2)-O(11)#4  | 154.76(6) |
| O(10)#1-Eu(1)-O(6)   | 125.28(7)  | O(1)-Eu(2)-Eu(1)      | 37.35(4)  |
| O(10)#1-Eu(1)-N(3)#2 | 70.33(7)   | O(1)-Eu(2)-O(4)#3     | 130.73(6) |
| O(10)#1-Eu(1)-O(14)  | 71.75(9)   | O(1)-Eu(2)-O(12)#4    | 71.69(6)  |
| O(2)-Eu(1)-Eu(2)     | 75.43(4)   | O(1)-Eu(2)-O(5)       | 69.24(6)  |
| O(2)-Eu(1)-O(1)      | 51.33(6)   | O(1)-Eu(2)-O(11)#4    | 121.94(6) |
| O(2)-Eu(1)-O(5)      | 85.22(6)   | O(4)#3-Eu(2)-Eu(1)    | 145.86(4) |
| O(2)-Eu(1)-O(6)      | 71.43(6)   | O(12)#4-Eu(2)-Eu(1)   | 85.34(5)  |
| O(2)-Eu(1)-N(3)#2    | 72.05(7)   | O(12)#4-Eu(2)-O(4)#3  | 124.96(6) |
| O(6)-Eu(1)-Eu(2)     | 79.87(4)   | O(12)#4-Eu(2)-O(5)    | 79.09(6)  |
| O(6)-Eu(1)-O(1)      | 94.50(6)   | O(5)-Eu(2)-Eu(1)      | 36.14(4)  |
| O(6)-Eu(1)-N(3)#2    | 73.17(7)   | O(5)-Eu(2)-O(4)#3     | 150.42(6) |
| O(13)-Eu(1)-Eu(2)    | 99.77(5)   | O(3)#3-Eu(2)-Eu(1)    | 113.33(5) |
| O(13)-Eu(1)-O(1)     | 69.60(7)   | O(3)#3-Eu(2)-O(1)     | 80.50(6)  |
| O(13)-Eu(1)-O(5)     | 133.84(7)  | O(3)#3-Eu(2)-O(4)#3   | 53.37(6)  |
| O(13)-Eu(1)-O(2)     | 72.85(7)   | O(3)#3-Eu(2)-O(12)#4  | 97.49(7)  |
| O(13)-Eu(1)-O(6)     | 143.12(7)  | O(3)#3-Eu(2)-O(5)     | 149.14(6) |
| O(13)-Eu(1)-N(3)#2   | 87.48(8)   | O(3)#3-Eu(2)-O(11)#4  | 87.76(7)  |
| N(3)#2-Eu(1)-Eu(2)   | 142.84(5)  | O(11)#4-Eu(2)-Eu(1)   | 136.87(5) |
| N(3)#2-Eu(1)-O(1)    | 122.65(6)  | O(11)#4-Eu(2)-O(4)#3  | 77.05(6)  |
| O(14)-Eu(1)-Eu(2)    | 104.40(10) | O(11)#4-Eu(2)-O(12)#4 | 53.75(6)  |
| O(14)-Eu(1)-O(1)     | 138.85(10) | O(11)#4-Eu(2)-O(5)    | 113.02(6) |
| O(14)-Eu(1)-O(5)     | 75.69(9)   | Eu(2)-O(1)-Eu(1)      | 108.17(7) |
| O(14)-Eu(1)-O(2)     | 138.91(9)  | Eu(2)-O(5)-Eu(1)      | 109.39(6) |
| O(14)-Eu(1)-O(6)     | 68.23(8)   |                       |           |

---

### 1-Tb

|                   |           |                    |            |
|-------------------|-----------|--------------------|------------|
| Tb(2)-O(6)        | 2.308(2)  | Tb(1)-O(11)        | 2.280(2)   |
| Tb(2)-O(10)#1     | 2.531(2)  | Tb(1)-O(13)        | 2.406(2)   |
| Tb(2)-O(9)        | 2.531(2)  | Tb(1)-O(1)         | 2.496(2)   |
| Tb(2)-O(3)        | 2.590(2)  | Tb(1)-O(9)         | 2.412(2)   |
| Tb(2)-O(12)       | 2.344(2)  | Tb(1)-O(3)         | 2.402(2)   |
| Tb(2)-O(4)        | 2.444(2)  | Tb(1)-O(5)         | 2.288(2)   |
| Tb(2)-O(7)        | 2.384(3)  | Tb(1)-O(2)         | 2.360(2)   |
| Tb(2)-O(8)        | 2.359(3)  | Tb(1)-O(14)#1      | 2.409(2)   |
| Tb(2)-N(3)#2      | 2.541(3)  | O(6)-Tb(2)-O(10)#1 | 129.65(8)  |
| O(6)-Tb(2)-O(9)   | 81.33(8)  | O(8)-Tb(2)-O(10)#1 | 68.37(9)   |
| O(6)-Tb(2)-O(3)   | 76.46(8)  | O(8)-Tb(2)-O(9)    | 75.90(10)  |
| O(6)-Tb(2)-O(12)  | 81.36(8)  | O(8)-Tb(2)-O(3)    | 138.59(11) |
| O(6)-Tb(2)-O(4)   | 127.04(8) | O(8)-Tb(2)-O(4)    | 139.14(10) |
| O(6)-Tb(2)-O(7)   | 81.04(10) | O(8)-Tb(2)-O(7)    | 144.11(10) |
| O(6)-Tb(2)-O(8)   | 85.82(12) | O(8)-Tb(2)-N(3)#2  | 88.53(13)  |
| O(6)-Tb(2)-N(3)#2 | 151.71(9) | N(3)#2-Tb(2)-O(3)  | 123.52(8)  |

|                       |           |                     |           |
|-----------------------|-----------|---------------------|-----------|
| O(6)-Tb(2)-C(23)#1    | 106.58(9) | O(11)-Tb(1)-O(13)   | 120.97(8) |
| O(6)-Tb(2)-C(5)#3     | 101.61(9) | O(11)-Tb(1)-O(1)    | 74.22(8)  |
| O(10)#1-Tb(2)-O(3)    | 94.85(7)  | O(11)-Tb(1)-O(9)    | 78.14(8)  |
| O(10)#1-Tb(2)-N(3)#2  | 72.66(8)  | O(11)-Tb(1)-O(3)    | 142.08(8) |
| O(10)#1-Tb(2)-C(23)#1 | 25.33(8)  | O(11)-Tb(1)-O(5)    | 82.35(9)  |
| O(10)#1-Tb(2)-C(5)#3  | 84.59(9)  | O(11)-Tb(1)-O(2)    | 127.42(8) |
| O(9)-Tb(2)-O(10)#1    | 51.46(7)  | O(11)-Tb(1)-O(14)#1 | 87.24(8)  |
| O(9)-Tb(2)-O(3)       | 64.71(7)  | O(13)-Tb(1)-O(1)    | 125.04(8) |
| O(9)-Tb(2)-N(3)#2     | 123.97(8) | O(13)-Tb(1)-O(9)    | 78.82(8)  |
| O(12)-Tb(2)-O(10)#1   | 125.58(9) | O(13)-Tb(1)-O(14)#1 | 54.21(8)  |
| O(12)-Tb(2)-O(9)      | 144.40(8) | O(9)-Tb(1)-O(1)     | 150.35(8) |
| O(12)-Tb(2)-O(3)      | 139.03(8) | O(3)-Tb(1)-O(13)    | 71.88(8)  |
| O(12)-Tb(2)-O(4)      | 129.78(9) | O(3)-Tb(1)-O(1)     | 130.78(8) |
| O(12)-Tb(2)-O(7)      | 73.07(10) | O(3)-Tb(1)-O(9)     | 69.40(8)  |
| O(12)-Tb(2)-O(8)      | 72.01(10) | O(3)-Tb(1)-O(14)#1  | 122.75(8) |
| O(12)-Tb(2)-N(3)#2    | 70.53(9)  | O(5)-Tb(1)-O(13)    | 149.47(8) |
| O(4)-Tb(2)-O(10)#1    | 71.47(8)  | O(5)-Tb(1)-O(1)     | 77.72(8)  |
| O(4)-Tb(2)-O(9)       | 85.12(8)  | O(5)-Tb(1)-O(9)     | 88.27(8)  |
| O(4)-Tb(2)-O(3)       | 51.66(7)  | O(5)-Tb(1)-O(3)     | 77.71(8)  |
| O(4)-Tb(2)-N(3)#2     | 72.53(9)  | O(5)-Tb(1)-O(2)     | 80.08(9)  |
| O(7)-Tb(2)-O(10)#1    | 142.70(9) | O(5)-Tb(1)-O(14)#1  | 154.31(8) |
| O(7)-Tb(2)-O(9)       | 133.82(8) | O(2)-Tb(1)-O(13)    | 97.11(9)  |
| O(7)-Tb(2)-O(3)       | 69.77(8)  | O(2)-Tb(1)-O(1)     | 53.74(8)  |
| O(7)-Tb(2)-O(4)       | 72.54(9)  | O(2)-Tb(1)-O(9)     | 149.32(8) |
| O(7)-Tb(2)-N(3)#2     | 87.57(10) | O(2)-Tb(1)-O(3)     | 80.38(8)  |
| O(14)#1-Tb(1)-O(1)    | 76.86(8)  | O(2)-Tb(1)-O(14)#1  | 87.90(9)  |
| O(14)#1-Tb(1)-O(9)    | 112.53(8) |                     |           |

---

### 1-Gd

|                     |           |                    |           |
|---------------------|-----------|--------------------|-----------|
| Gd(1)-Gd(2)         | 4.0680(5) | Gd(2)-O(12)#1      | 2.421(4)  |
| Gd(1)-O(8)#1        | 2.545(4)  | Gd(2)-O(2)         | 2.506(4)  |
| Gd(1)-O(3)#2        | 2.612(4)  | Gd(2)-O(1)         | 2.375(4)  |
| Gd(1)-O(6)          | 2.314(4)  | Gd(2)-O(11)#1      | 2.425(4)  |
| Gd(1)-O(10)#3       | 2.372(4)  | Gd(2)-O(5)         | 2.306(4)  |
| Gd(1)-O(7)#1        | 2.574(4)  | O(8)-Gd(1)#3       | 2.545(4)  |
| Gd(1)-O(4)#2        | 2.472(4)  | O(3)-Gd(1)#2       | 2.612(4)  |
| Gd(1)-N(3)#4        | 2.556(5)  | O(3)-Gd(2)#2       | 2.442(4)  |
| Gd(1)-O(14)         | 2.378(5)  | O(10)-Gd(1)#1      | 2.372(4)  |
| Gd(1)-O(15)         | 2.412(5)  | O(7)-Gd(1)#3       | 2.574(4)  |
| Gd(2)-O(3)#2        | 2.442(4)  | O(7)-Gd(2)#3       | 2.431(4)  |
| Gd(2)-O(9)          | 2.296(4)  | O(12)-Gd(2)#3      | 2.421(4)  |
| Gd(2)-O(7)#1        | 2.431(4)  | O(4)-Gd(1)#2       | 2.472(4)  |
| O(8)#1-Gd(1)-Gd(2)  | 79.78(9)  | O(11)-Gd(2)#3      | 2.425(4)  |
| O(8)#1-Gd(1)-O(3)#2 | 94.63(13) | N(3)-Gd(1)#5       | 2.556(5)  |
| O(8)#1-Gd(1)-O(7)#1 | 50.86(13) | O(15)-Gd(1)-O(4)#2 | 71.97(17) |

|                      |            |                       |            |
|----------------------|------------|-----------------------|------------|
| O(8)#1-Gd(1)-N(3)#4  | 73.09(15)  | O(15)-Gd(1)-N(3)#4    | 88.16(18)  |
| O(3)#2-Gd(1)-Gd(2)   | 35.00(9)   | O(3)#2-Gd(2)-Gd(1)    | 37.84(9)   |
| O(6)-Gd(1)-Gd(2)     | 64.31(11)  | O(3)#2-Gd(2)-O(2)     | 130.35(13) |
| O(6)-Gd(1)-O(8)#1    | 129.00(15) | O(9)-Gd(2)-Gd(1)      | 104.87(10) |
| O(6)-Gd(1)-O(3)#2    | 76.51(14)  | O(9)-Gd(2)-O(3)#2     | 142.31(14) |
| O(6)-Gd(1)-O(10)#3   | 81.92(15)  | O(9)-Gd(2)-O(7)#1     | 77.76(14)  |
| O(6)-Gd(1)-O(7)#1    | 81.06(15)  | O(9)-Gd(2)-O(12)#1    | 120.75(15) |
| O(6)-Gd(1)-O(4)#2    | 126.47(15) | O(9)-Gd(2)-O(2)       | 74.42(14)  |
| O(6)-Gd(1)-N(3)#4    | 151.88(16) | O(9)-Gd(2)-O(1)       | 127.13(15) |
| O(6)-Gd(1)-O(14)     | 86.9(2)    | O(9)-Gd(2)-O(11)#1    | 87.04(15)  |
| O(6)-Gd(1)-O(15)     | 81.00(19)  | O(9)-Gd(2)-O(5)       | 82.54(15)  |
| O(10)#3-Gd(1)-Gd(2)  | 146.23(10) | O(7)#1-Gd(2)-Gd(1)    | 36.83(9)   |
| O(10)#3-Gd(1)-O(8)#1 | 126.06(15) | O(7)#1-Gd(2)-O(3)#2   | 70.23(13)  |
| O(10)#3-Gd(1)-O(3)#2 | 138.65(15) | O(7)#1-Gd(2)-O(2)     | 150.38(14) |
| O(10)#3-Gd(1)-O(7)#1 | 144.57(15) | O(12)#1-Gd(2)-Gd(1)   | 85.66(10)  |
| O(10)#3-Gd(1)-O(4)#2 | 129.33(15) | O(12)#1-Gd(2)-O(3)#2  | 72.17(14)  |
| O(10)#3-Gd(1)-N(3)#4 | 70.09(15)  | O(12)#1-Gd(2)-O(7)#1  | 78.63(15)  |
| O(10)#3-Gd(1)-O(14)  | 71.60(18)  | O(12)#1-Gd(2)-O(2)    | 124.84(15) |
| O(10)#3-Gd(1)-O(15)  | 73.22(17)  | O(12)#1-Gd(2)-O(11)#1 | 53.20(14)  |
| O(7)#1-Gd(1)-Gd(2)   | 34.47(9)   | O(2)-Gd(2)-Gd(1)      | 145.83(10) |
| O(7)#1-Gd(1)-O(3)#2  | 65.42(12)  | O(1)-Gd(2)-Gd(1)      | 113.41(10) |
| O(4)#2-Gd(1)-Gd(2)   | 75.63(10)  | O(1)-Gd(2)-O(3)#2     | 80.09(14)  |
| O(4)#2-Gd(1)-O(8)#1  | 71.84(15)  | O(1)-Gd(2)-O(7)#1     | 149.82(14) |
| O(4)#2-Gd(1)-O(3)#2  | 50.98(13)  | O(1)-Gd(2)-O(12)#1    | 97.78(16)  |
| O(4)#2-Gd(1)-O(7)#1  | 85.41(14)  | O(1)-Gd(2)-O(2)       | 53.36(14)  |
| O(4)#2-Gd(1)-N(3)#4  | 73.13(15)  | O(1)-Gd(2)-O(11)#1    | 89.54(16)  |
| N(3)#4-Gd(1)-Gd(2)   | 143.57(11) | O(11)#1-Gd(2)-Gd(1)   | 136.04(10) |
| N(3)#4-Gd(1)-O(3)#2  | 123.44(15) | O(11)#1-Gd(2)-O(3)#2  | 122.34(14) |
| N(3)#4-Gd(1)-O(7)#1  | 123.85(14) | O(11)#1-Gd(2)-O(7)#1  | 110.67(14) |
| O(14)-Gd(1)-Gd(2)    | 105.35(17) | O(11)#1-Gd(2)-O(2)    | 78.02(14)  |
| O(14)-Gd(1)-O(8)#1   | 68.36(16)  | O(5)-Gd(2)-Gd(1)      | 67.94(11)  |
| O(14)-Gd(1)-O(3)#2   | 140.31(19) | O(5)-Gd(2)-O(3)#2     | 77.26(14)  |
| O(14)-Gd(1)-O(7)#1   | 76.64(18)  | O(5)-Gd(2)-O(7)#1     | 88.33(15)  |
| O(14)-Gd(1)-O(4)#2   | 139.18(17) | O(5)-Gd(2)-O(12)#1    | 149.27(15) |
| O(14)-Gd(1)-N(3)#4   | 86.9(2)    | O(5)-Gd(2)-O(2)       | 78.24(15)  |
| O(14)-Gd(1)-O(15)    | 144.02(18) | O(5)-Gd(2)-O(1)       | 79.71(16)  |
| O(15)-Gd(1)-Gd(2)    | 99.60(13)  | O(5)-Gd(2)-O(11)#1    | 155.88(15) |
| O(15)-Gd(1)-O(8)#1   | 142.72(17) | Gd(2)#2-O(3)-Gd(1)#2  | 107.16(14) |
| O(15)-Gd(1)-O(3)#2   | 68.89(15)  | Gd(2)#3-O(7)-Gd(1)#3  | 108.71(15) |
| O(15)-Gd(1)-O(7)#1   | 133.59(16) |                       |            |

---

**1-Eu:** #1 -x+1/2,y-1/2,-z+1/2; #2 -x+1,-y+1,-z+1; #3 -x+1,y,-z+1/2; #4 -x+1/2,y+1/2,-z+1/2; **1-Tb:** #1 -x+3/2,y-1/2,-z+1/2; #2 x,-y+1,z-1/2; #3 -x+1,y,-z+1/2; #4 -x+3/2,y+1/2,-z+1/2; #5 x,-y+1,z+1/2; **1-Gd:** #1 -x+1/2,y+1/2,-z+3/2; #2 -x+1,y,-z+3/2; #3 -x+1/2,y-1/2,-z+3/2; #4 x,-y+1,z+1/2; #5 x,-y+1,z-1/2;

**Table S2.** Summary of the quantum yields of the reported white-light-emission doped MOFs.

| Complex                                                        | Quantum yield | Ref.             |
|----------------------------------------------------------------|---------------|------------------|
| La <sub>0.6</sub> Eu <sub>0.1</sub> Tb <sub>0.3</sub> -BTPCA   | 47.33 %       | 1                |
| Eu <sub>0.005</sub> Tb <sub>0.995</sub> -BTPCA                 | 46.15 %       |                  |
| Eu <sub>0.01</sub> Gd <sub>0.6015</sub> Tb <sub>0.3885</sub>   | 36.49 %       | <b>This work</b> |
| Eu <sub>0.0855</sub> Gd <sub>0.6285</sub> Tb <sub>0.2860</sub> | 22.4 %        | 2                |
| HMA-Tb <sub>10</sub> Eu <sub>1</sub>                           | 11.41 %       | 3                |
| 0.5% Eu <sup>3+</sup> -doped 2-Tb                              | 11.4 %        | 4                |

**Table S3.** The quenching constants of **1-Eu** and reported MOFs for NB.

| Complex                                                                                      | Quenching Constants<br>(K <sub>SV</sub> /M <sup>-1</sup> ) | Ref.             |
|----------------------------------------------------------------------------------------------|------------------------------------------------------------|------------------|
| [Cd(TPA)(DIB)](n)                                                                            | 1.7 × 10 <sup>4</sup>                                      | 5                |
| [Zn <sub>2</sub> (4,4'-nba) <sub>2</sub> (1,4-bib) <sub>2</sub> ] <sub>n</sub>               | 1.59 × 10 <sup>4</sup>                                     | 6                |
| {[Eu <sub>2</sub> (L) <sub>3</sub> ·DMF·H <sub>2</sub> O]·DMF·H <sub>2</sub> O} <sub>n</sub> | 1.5143 × 10 <sup>4</sup>                                   | <b>This work</b> |
| {MgL(H <sub>2</sub> O) <sub>2</sub> } <sub>n</sub>                                           | 1.07 × 10 <sup>4</sup>                                     | 7                |
| Ln <sub>2</sub> (NSBPDC) <sub>3</sub> (H <sub>2</sub> O) <sub>4</sub> ·x(H <sub>2</sub> O)   | 6.5512 × 10 <sup>3</sup>                                   | 8                |
| Zn <sub>3</sub> (BTC) <sub>2</sub> : Eu(III)                                                 | 3.957 × 10 <sup>3</sup>                                    | 9                |
| [Zn(H <sub>2</sub> L <sup>2-</sup> )(H <sub>2</sub> O)] <sub>n</sub>                         | 3.26 × 10 <sup>3</sup>                                     | 10               |
| {[Zn(L)](DMF) <sub>3</sub> } <sub>n</sub>                                                    | 2.875 × 10 <sup>3</sup>                                    | 11               |

**Table S4.** Results of ICP Analyses of Eu<sup>3+</sup>.

| Samples                              | Concentration of Eu <sup>3+</sup> (ppb) |
|--------------------------------------|-----------------------------------------|
| NB@CH <sub>3</sub> OH                | 6.375                                   |
| Filter liquor of recycle <b>1-Eu</b> | 6.813                                   |

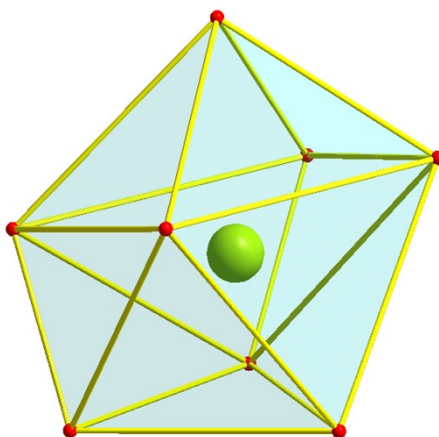**Figure S1. (a)** A distorted trigondodecahedron geometry.

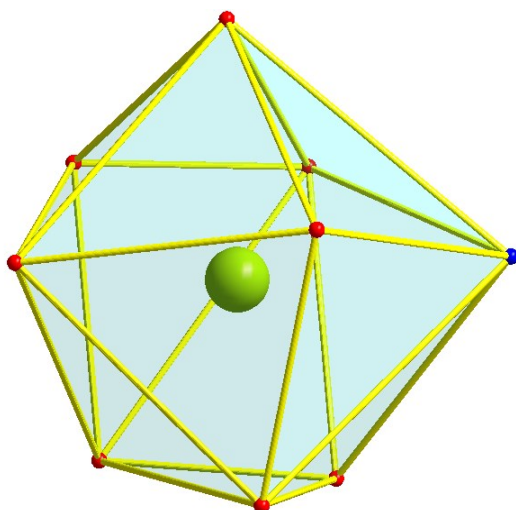

**Figure S1. (b)** A distorted tetrakaidecahedron geometry.

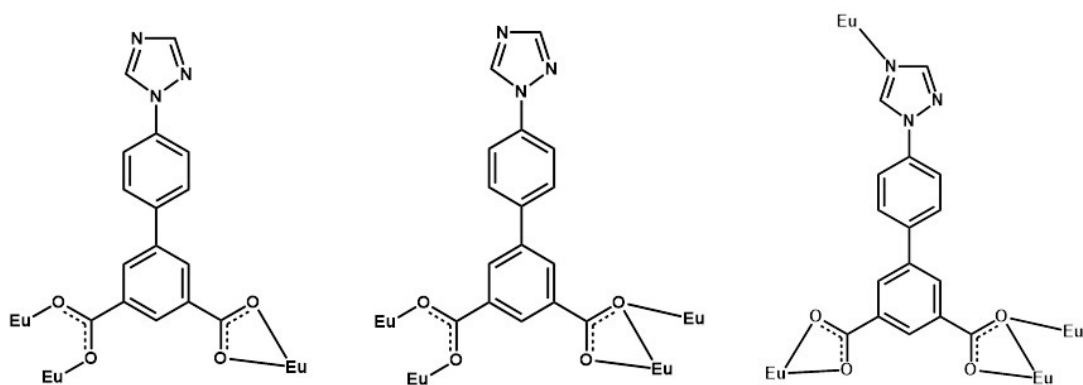

**Figure S2.** Three coordination modes of  $L^{2-}$  in **1-Eu**, ( $\eta^2\mu_2\chi^2$ ,  $\eta^2\mu_1\chi^2$  and  $\eta^2\mu_2\chi^3$ ).

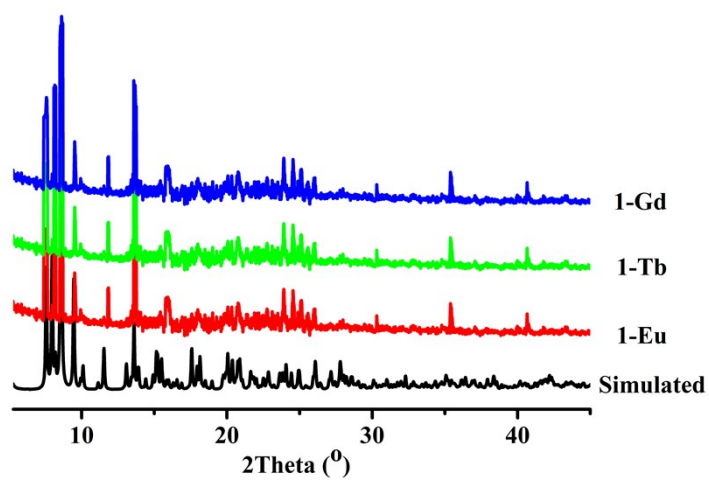

**Figure S3.** PXRD patterns of **1-Eu** simulated from the X-ray single-crystal structure and as-synthesized samples of **1-Eu**, **1-Tb** and **1-Gd**.



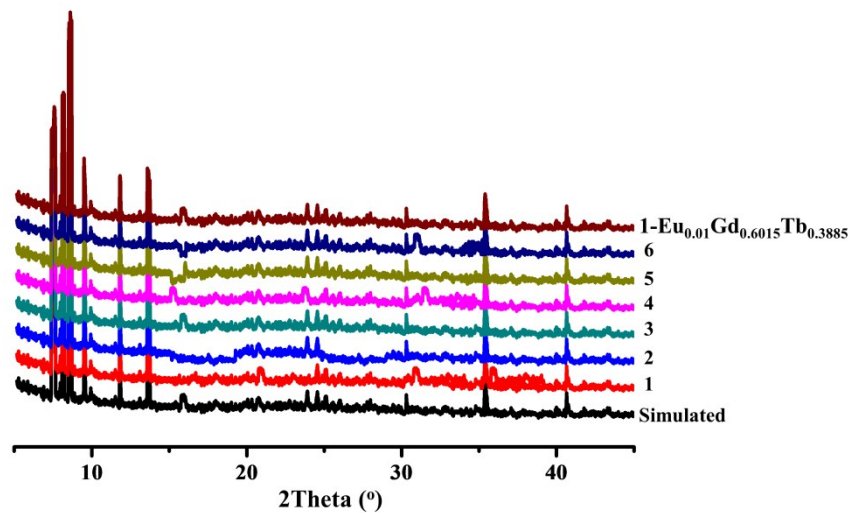

Figure S4. PXRD patterns of doped samples.

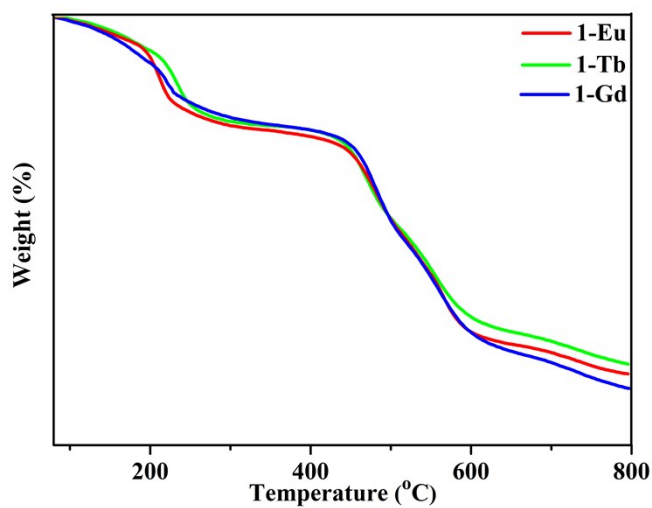

Figure S5. The TGA plots of 1-Eu, 1-Tb and 1-Gd under N<sub>2</sub> environment.

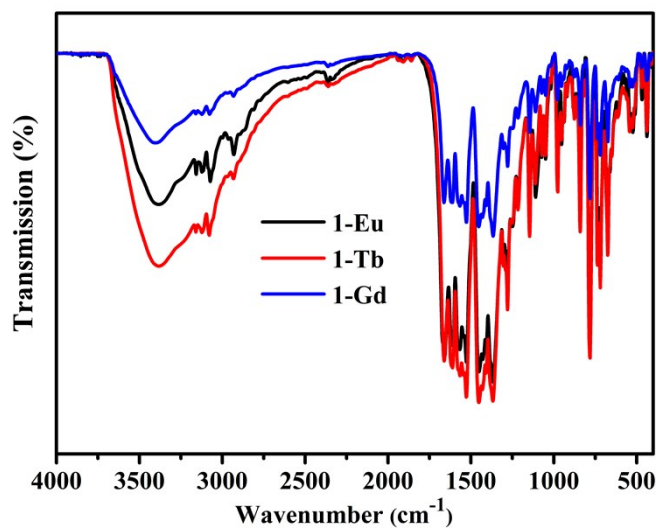

Figure S6. The FT-IR spectrometer of 1-Eu, 1-Tb and 1-Gd.

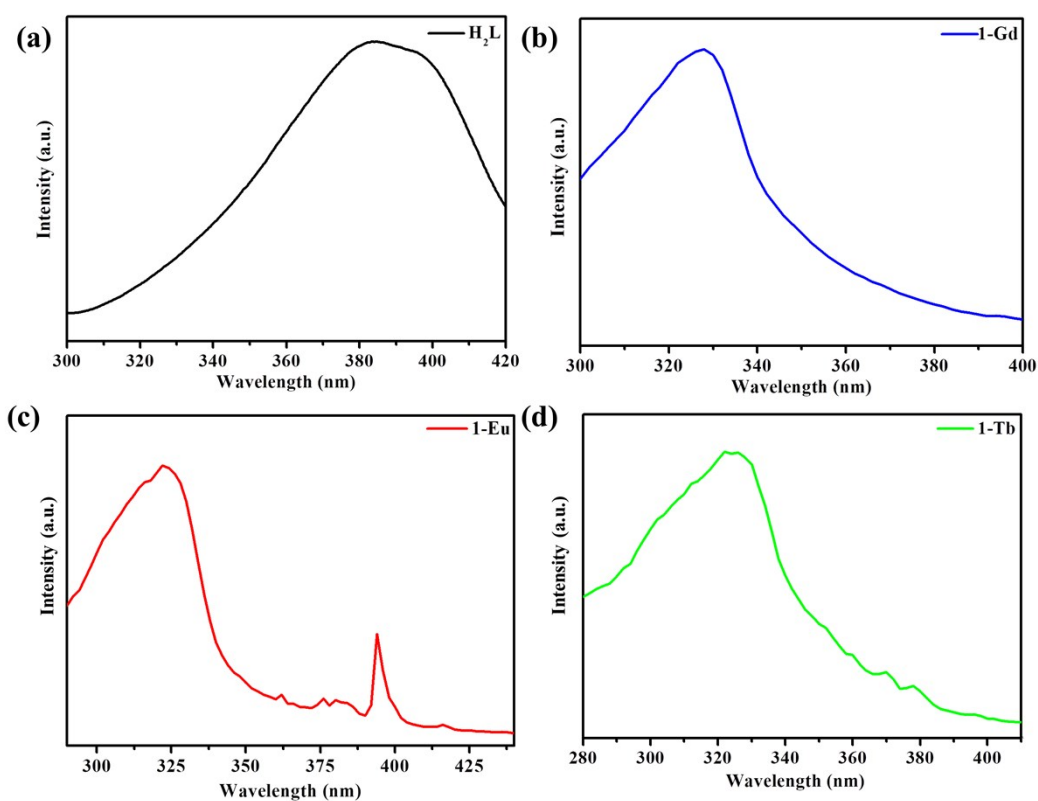

**Figure S7.** Solid state excitation spectra of  $H_2L$  (a),  $1-Gd$ (b),  $1-Eu$ (c) and  $1-Tb$ (d).

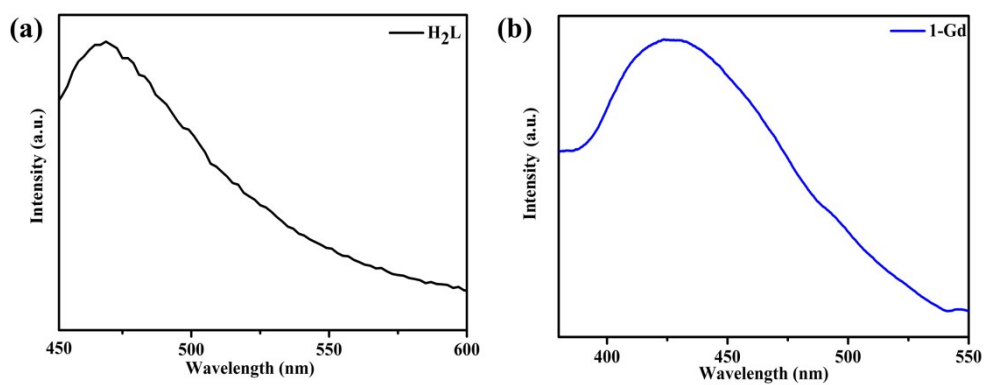

**Figure S8.** Solid-state emission spectra of  $H_2L$ (a),  $1-Gd$  (b).

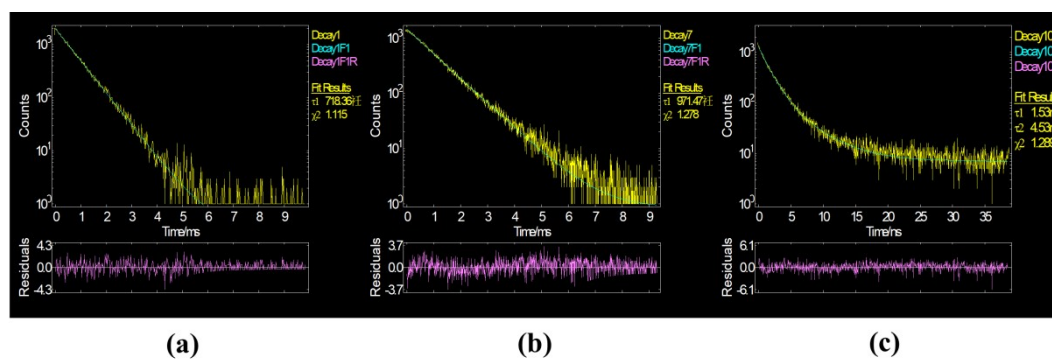

**Figure S9.** Luminescence decay lifetimes of  $1-Eu$  (a),  $1-Tb$  (b) and  $1-Gd$  (c) measured at the excitation.

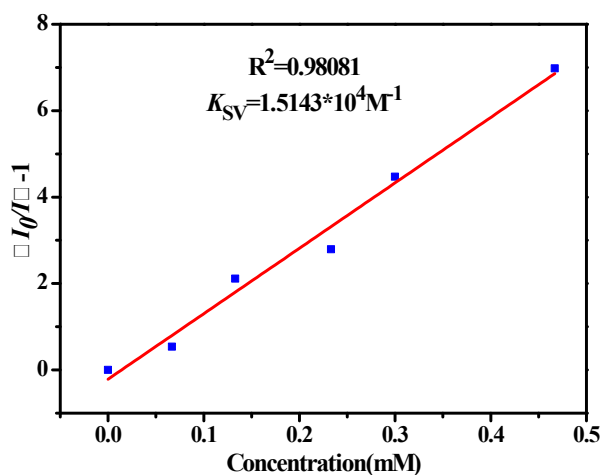

**Figure S10.** Linear correlation for the plot of  $(I_0/I)-1$  vs concentration of nitrobenzene in low concentration range.

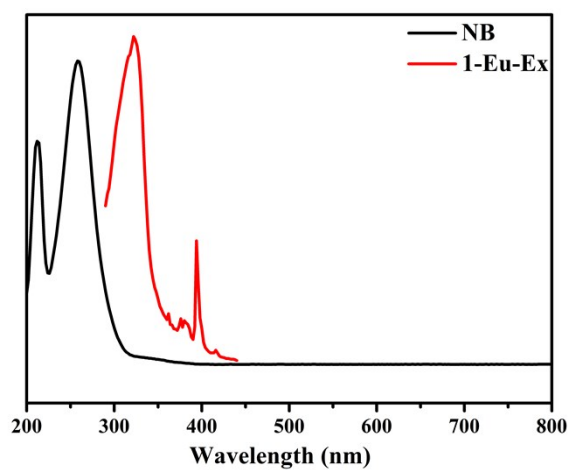

**Figure S11.** UV-Vis adsorption spectra of nitrobenzene in  $\text{CH}_3\text{OH}$  solution and excitation spectrum of **1-Eu** in  $\text{CH}_3\text{OH}$  solution.

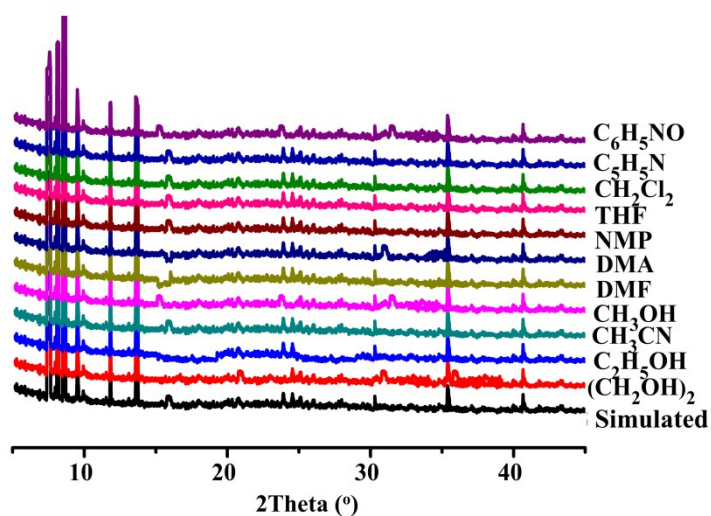

**Figure S12.** The PXRD patterns of **1-Eu** treated by small organic molecules solutions.

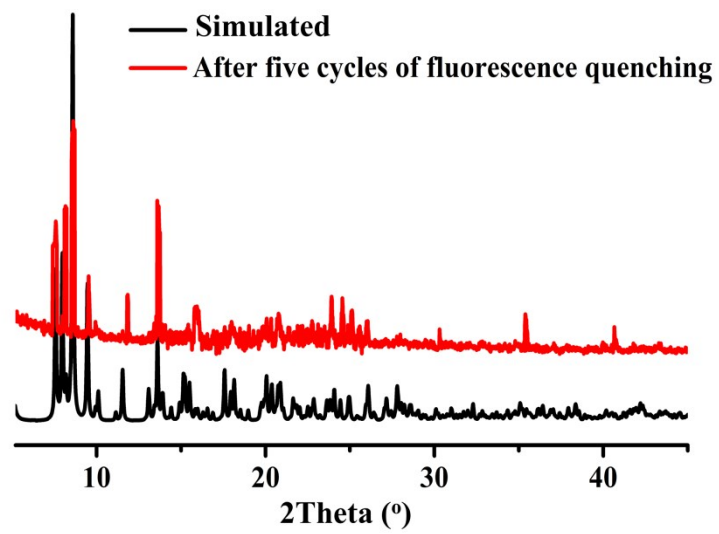

**Figure S13.** The PXRD patterns of 1-Eu treated by multi-cycle fluorescence quenching.

## References:

1. Q. Tang, S. Liu, Y. Liu, D. He, J. Miao, X. Wang, Y. Ji and Z. Zheng, Color tuning and white light emission via in situ doping of luminescent lanthanide metal-organic frameworks, *Inorg. Chem.*, 2014, **53**, 289-293.
2. X.-Y. Li, W.-J. Shi, X.-Q. Wang, L.-N. Ma, L. Hou and Y.-Y. Wang, Luminescence Modulation, White Light Emission, and Energy Transfer in a Family of Lanthanide Metal-Organic Frameworks Based on a Planar  $\pi$ -Conjugated Ligand, *Cryst. Growth Des.*, 2017, **17**, 4217-4224.
3. H. Liu, T. Chu, Z. Rao, S. Wang, Y. Yang and W.-T. Wong, The Tunable White-Light and Multicolor Emission in An Electrodeposited Thin Film of Mixed Lanthanide Coordination Polymers, *Adv. Opt. Mater.*, 2015, **3**, 1545-1550.
4. Z.-F. Liu, M.-F. Wu, S.-H. Wang, F.-K. Zheng, G.-E. Wang, J. Chen, Y. Xiao, A. Q. Wu, G.-C. Guo and J.-S. Huang, Eu<sup>3+</sup>-doped Tb<sup>3+</sup> metal-organic frameworks emitting tunable three primary colors towards white light, *J. Mater. Chem. C*, 2013, **1**, 4634-4639.
5. X. Wang, Y. Han, X. X. Han, X. Hou, J.-J. Wang and F. Fu, Highly selective and sensitive detection of Hg<sup>2+</sup>, Cr<sub>2</sub>O<sub>7</sub><sup>2-</sup>, and nitrobenzene/2,4-dinitrophenol in water via two fluorescent Cd-CPs, *New J. Chem.*, 2018, **42**, 19844-19852.
6. T.-Y. Xu, J.-M. Li, Y.-H. Han, A.-R. Wang, K.-H. He and Z.-F. Shi, A new 3D four-fold interpenetrated dia-like luminescent Zn(II)-based metal-organic framework: the sensitive detection of Fe<sup>3+</sup>, Cr<sub>2</sub>O<sub>7</sub><sup>2-</sup>, and CrO<sub>4</sub><sup>2-</sup> in water, and nitrobenzene in ethanol, *New J. Chem.*, 2020, **44**, 4011-4022.
7. Y. S. Xue, W. Cheng, J. P. Cao and Y. Xu, 3D Enantiomorphic Mg-Based Metal-Organic Frameworks as Chemical Sensor of Nitrobenzene and Efficient Catalyst for CO<sub>2</sub> Cycloaddition, *Chem-Asian J.*, 2019, **14**, 1949-1957.
8. L.-L. Ren, Y.-Y. Cui, A.-L. Cheng and E.-Q. Gao, Water-stable lanthanide-based metal-organic frameworks for rapid and sensitive detection of nitrobenzene derivatives, *J. Solid State Chem.*, 2019, **270**, 463-469.
9. S. Xian, H.-L. Chen, W.-L. Feng, X.-Z. Yang, Y.-Q. Wang and B.-X. Li, Eu(III) doped zinc metal organic framework material and its sensing detection for nitrobenzene, *J. Solid State Chem.*, 2019, **280**, 120984.
10. Q. Zhao and C.-D. Si, A Novel Zinc Luminescent Coordination Polymer Based on a Tetracarboxylate Acid Ligand for the Detection of Nitrobenzene, *Cryst. Res. Technol.*, 2019, **54**, 1800155.
11. L. Wei, J. Lou, L. Liu, X.-Z. Ma, J. Li, R. Pan and Y.-X. Zhang, Zn(II)-Containing Metal-Organic Framework for Fluorescence Detection of Nitrobenzene and Prevention Effect on Hypertension via Down-Regulating the Expression of Vitamin D Receptor, *J. Clust. Sci.*, 2019, **31**, 479-486.
